# Supplementary material
Source: PubMed Central journal article supplement (PMC4534636)
Supplement: IAI.00828-15_zii999091381so1.pdf [file IAI.00828-15_zii999091381so1.pdf]

1 SUPPLEMENTAL FIGURE WITH LEGEND

2

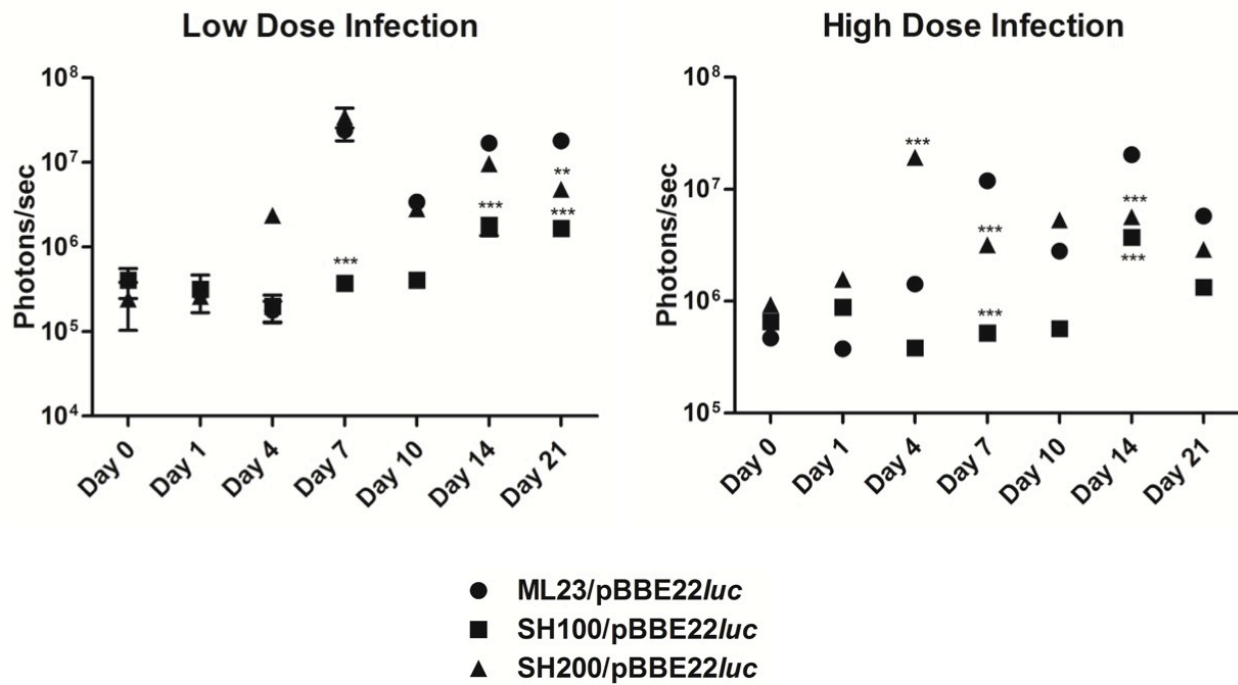

3

4

5

6 **Fig. S1.** Regions of interest (ROI) were selected to measure the luminescence from the 1-  
7 minute exposure images using an equal area of the whole body for all mice in all experiments.  
8 BALB/c mice were infected with ML23/pBBE22luc (Parent; filled circles), SH100 (*Δbb0744*;  
9 filled squares), or SH200 (*bb0744* complement; filled triangles) at the doses indicated. The  
10 luminescence for mice that received D-luciferin were averaged and normalized by subtracting  
11 the background luminescence on the negative control mouse. The points displayed depict the  
12 average luminescence of three mice on each day with bars representing standard error. \*\*  
13 denotes a *P*-value < 0.01; \*\*\* denotes a *P*-value < 0.005.

14
